# Supplementary material for: Home before Hospital: a whole of system re-design project to improve rates of home-based dialysis therapy: Experience and outcomes over 8 years
Source: Oxford University Press journal article supplement (doi:10.1093/intqhc/mzab108), 2021-07-01
Supplement: mzab108_supp.zip [file mzab108_supp.zip]

Archive with 1 entries (1 files):
- Equator _ SQUIRE Guideline for Reporting of QI in HealthCare.pdf
