# Supplementary material for: Home before Hospital: a whole of system re-design project to improve rates of home-based dialysis therapy: Experience and outcomes over 8 years
Source: Oxford University Press journal article supplement (doi:10.1093/intqhc/mzab108), 2021-07-01
Supplement: mzab108_supp.zip [file mzab108_supp.zip › Equator _ SQUIRE Guideline for Reporting of QI in HealthCare.pdf]

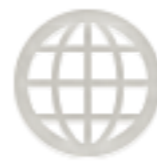

[Home](#) > [Library](#) > [Reporting guideline](#) > SQUIRE 2.0 (Standards for QUality Improvement Reporting Excellence): revised publication guidelines from a detailed consensus process

## Search for reporting guidelines

Use your browser's Back button to return to your search results

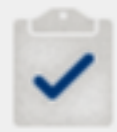

### SQUIRE 2.0 (Standards for QUality Improvement Reporting Excellence): revised publication guidelines from a detailed consensus process

|                                                                                                                                   |                                                                                                                                                                                                                                                                                                                                                                                                                                                                                                                                                                                                                                                                                                                                                                                                                                                                                                                                                                                                                                                                                                 |
|-----------------------------------------------------------------------------------------------------------------------------------|-------------------------------------------------------------------------------------------------------------------------------------------------------------------------------------------------------------------------------------------------------------------------------------------------------------------------------------------------------------------------------------------------------------------------------------------------------------------------------------------------------------------------------------------------------------------------------------------------------------------------------------------------------------------------------------------------------------------------------------------------------------------------------------------------------------------------------------------------------------------------------------------------------------------------------------------------------------------------------------------------------------------------------------------------------------------------------------------------|
| <b>Reporting guideline provided for?</b><br>(i.e. exactly what the authors state in the paper)                                    | Quality improvement in health care<br><br><a href="#">SQUIRE 2.0 checklist (PDF)</a> - 2015 update                                                                                                                                                                                                                                                                                                                                                                                                                                                                                                                                                                                                                                                                                                                                                                                                                                                                                                                                                                                              |
| <b>Full bibliographic reference</b>                                                                                               | <p>Ogrinc G, Davies L, Goodman D, Batalden P, Davidoff F, Stevens D. SQUIRE 2.0 (Standards for QUality Improvement Reporting Excellence): revised publication guidelines from a detailed consensus process.</p> <p>This guideline was published simultaneously in 7 journals. You can read the guideline in any of these journals using the links below.</p> <p>BMJ Qual Saf. 2015. PMID: <a href="#">26369893</a><br/>J Nurs Care Qual. 2015. PMID: <a href="#">26429125</a><br/>Am J Crit Care. 2015. PMID: <a href="#">26523003</a><br/>Perm J. 2015. PMID: <a href="#">26517437</a><br/>J Surg Res. 2015. PMID: <a href="#">26515734</a><br/>J Contin Educ Nurs. 2015. PMID: <a href="#">26509402</a><br/>J Am Coll Surg. 2016;222(3):317-323. PMID: <a href="#">26385723</a></p>                                                                                                                                                                                                                                                                                                           |
| <b>Language</b>                                                                                                                   | English                                                                                                                                                                                                                                                                                                                                                                                                                                                                                                                                                                                                                                                                                                                                                                                                                                                                                                                                                                                                                                                                                         |
| <b>Relevant URLs (full-text if available)</b>                                                                                     | The full-text of the SQUIRE 2.0 update, published in 2015, is available from: <a href="#">SQUIRE 2.0</a>                                                                                                                                                                                                                                                                                                                                                                                                                                                                                                                                                                                                                                                                                                                                                                                                                                                                                                                                                                                        |
| <b>Availability in additional languages</b>                                                                                       | The SQUIRE 2.0 guideline is available in <a href="#">Italian</a> .                                                                                                                                                                                                                                                                                                                                                                                                                                                                                                                                                                                                                                                                                                                                                                                                                                                                                                                                                                                                                              |
| <b>Relevant more generic / specialised reporting guidelines (i.e. main generic guideline or extension to a generic guideline)</b> | <b>Specialised</b><br><b>SQUIRE-EDU</b> : Ogrinc G, Armstrong GE, Dolansky MA, Singh MK, Davies L. SQUIRE-EDU (Standards for QUality Improvement Reporting Excellence in Education): Publication Guidelines for Educational Improvement. Acad Med. 2019 Oct;94(10):1461-1470. PMID: <a href="#">30998575</a>                                                                                                                                                                                                                                                                                                                                                                                                                                                                                                                                                                                                                                                                                                                                                                                    |
| <b>Reporting guideline website URL</b>                                                                                            | <a href="http://www.squire-statement.org/">http://www.squire-statement.org/</a>                                                                                                                                                                                                                                                                                                                                                                                                                                                                                                                                                                                                                                                                                                                                                                                                                                                                                                                                                                                                                 |
| <b>Reporting guideline acronym</b>                                                                                                | SQUIRE 2.0                                                                                                                                                                                                                                                                                                                                                                                                                                                                                                                                                                                                                                                                                                                                                                                                                                                                                                                                                                                                                                                                                      |
| <b>Study design</b>                                                                                                               | Quality improvement studies                                                                                                                                                                                                                                                                                                                                                                                                                                                                                                                                                                                                                                                                                                                                                                                                                                                                                                                                                                                                                                                                     |
| <b>Applies to the whole report or to individual sections of the report?</b>                                                       | Whole report                                                                                                                                                                                                                                                                                                                                                                                                                                                                                                                                                                                                                                                                                                                                                                                                                                                                                                                                                                                                                                                                                    |
| <b>Previous versions of this guideline / Guideline history</b>                                                                    | <p><b>SQUIRE 1.0</b><br/>The SQUIRE reporting guideline was originally published in 2008.</p> <p>Davidoff F, Batalden P, Stevens D, Ogrinc G, Mooney S. Publication guidelines for quality improvement in health care: evolution of the SQUIRE project.</p> <p>Qual Saf Health Care. 2008;17 Suppl 1:i3-i9. PMID: <a href="#">18836063</a><br/>BMJ. 2009; 338:a3152. PMID: <a href="#">19153129</a><br/>Jt Comm J Qual Patient Saf. 2008;34(11):681-687. PMID: <a href="#">19025090</a><br/>Ann Intern Med. 2008;149(9):670-676. PMID: <a href="#">18981488</a><br/>J Gen Intern Med. 2008;23(12):2125-2130. PMID: <a href="#">18830766</a></p> <p>Ogrinc G, Mooney SE, Estrada C, Foster T, Goldmann D, Hall LW, Huizinga MM, Liu SK, Mills P, Neily J, Nelson W, Pronovost PJ, Provost L, Rubenstein LV, Speroff T, Splaine M, Thomson R, Tomolo AM, Watts B. The SQUIRE (Standards for QUality Improvement Reporting Excellence) guidelines for quality improvement reporting: explanation and elaboration. Qual Saf Health Care. 2008;17 Suppl 1:i13-32. PMID: <a href="#">18836062</a></p> |
| <b>Record last updated on</b>                                                                                                     | February 3, 2021                                                                                                                                                                                                                                                                                                                                                                                                                                                                                                                                                                                                                                                                                                                                                                                                                                                                                                                                                                                                                                                                                |

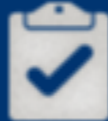

### Reporting guidelines for main study types

|                                               |                         |                            |
|-----------------------------------------------|-------------------------|----------------------------|
| <a href="#">Randomised trials</a>             | <a href="#">CONSORT</a> | <a href="#">Extensions</a> |
| <a href="#">Observational studies</a>         | <a href="#">STROBE</a>  | <a href="#">Extensions</a> |
| <a href="#">Systematic reviews</a>            | <a href="#">PRISMA</a>  | <a href="#">Extensions</a> |
| <a href="#">Study protocols</a>               | <a href="#">SPIRIT</a>  | <a href="#">PRISMA-P</a>   |
| <a href="#">Diagnostic/prognostic studies</a> | <a href="#">STARD</a>   | <a href="#">TRIPOD</a>     |
| <a href="#">Case reports</a>                  | <a href="#">CARE</a>    | <a href="#">Extensions</a> |
| <a href="#">Clinical practice guidelines</a>  | <a href="#">AGREE</a>   | <a href="#">RIGHT</a>      |
| <a href="#">Qualitative research</a>          | <a href="#">SRQR</a>    | <a href="#">COREQ</a>      |
| <a href="#">Animal pre-clinical studies</a>   | <a href="#">ARRIVE</a>  |                            |
| <a href="#">Quality improvement studies</a>   | <a href="#">SQUIRE</a>  | <a href="#">Extensions</a> |
| <a href="#">Economic evaluations</a>          | <a href="#">CHEERS</a>  |                            |

## Translations

Some reporting guidelines are also available in languages other than English. Find out more in our [Translations section](#).

We have also translated some of our website pages into other languages:

[EQUATOR resources in Spanish](#)  
[EQUATOR resources in Portuguese](#)  
[EQUATOR resources in German](#)

## About the Library

For information about Library scope and content, identification of reporting guidelines and inclusion/exclusion criteria please visit [About the Library](#).

Visit our [Help page](#) for information about searching for reporting guidelines and for general information about using our website.

## Library index

- [What is a reporting guideline?](#)
- [Search for reporting guidelines](#)
- [Browse reporting guidelines by specialty](#)
- [Reporting guidelines under development](#)
- [Translations of reporting guidelines](#)
- [EQUATOR Network reporting guideline manual](#)
- [Reporting guidelines for animal research](#)
- [Guidance on scientific writing](#)
- [Guidance developed by editorial groups](#)
- [Research funders' guidance on reporting requirements](#)
- [Professional medical writing support](#)
- [Research ethics, publication ethics and good practice guidelines](#)
- [Resources in German / Ressourcen auf Deutsch](#)
- [Resources in Portuguese / Recursos em Português](#)
- [Resources in Spanish / Recursos en español](#)
- [Links](#)
- [About the Library](#)

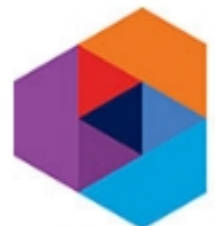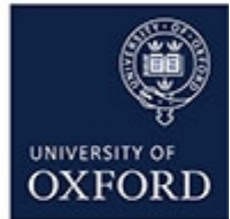

**Revised Standards for Quality Improvement Reporting Excellence (SQUIRE 2.0)**  
**September 15, 2015**

| Text Section and Item Name                    | Section or Item Description                                                                                                                                                                                                                                                                                                                                                                                                                                                                                                                                                                                                                                                                                                                                                                                                                                                                                                                                                                                                             |
|-----------------------------------------------|-----------------------------------------------------------------------------------------------------------------------------------------------------------------------------------------------------------------------------------------------------------------------------------------------------------------------------------------------------------------------------------------------------------------------------------------------------------------------------------------------------------------------------------------------------------------------------------------------------------------------------------------------------------------------------------------------------------------------------------------------------------------------------------------------------------------------------------------------------------------------------------------------------------------------------------------------------------------------------------------------------------------------------------------|
| <b>Notes to authors</b>                       | <ul style="list-style-type: none"> <li>• The SQUIRE guidelines provide a framework for reporting new knowledge about how to improve healthcare</li> <li>• The SQUIRE guidelines are intended for reports that describe <a href="#">system</a> level work to improve the quality, safety, and value of healthcare, and used methods to establish that observed outcomes were due to the <a href="#">intervention(s)</a>.</li> <li>• A range of approaches exists for improving healthcare. SQUIRE may be adapted for reporting any of these.</li> <li>• Authors should consider every SQUIRE item, but it may be inappropriate or unnecessary to include every SQUIRE element in a particular manuscript.</li> <li>• The SQUIRE Glossary contains definitions of many of the key words in SQUIRE.</li> <li>• The Explanation and Elaboration document provides specific examples of well-written SQUIRE items, and an in-depth explanation of each item.</li> <li>• Please cite SQUIRE when it is used to write a manuscript.</li> </ul> |
| <b>Title and Abstract</b>                     |                                                                                                                                                                                                                                                                                                                                                                                                                                                                                                                                                                                                                                                                                                                                                                                                                                                                                                                                                                                                                                         |
| <b>1. Title</b>                               | Indicate that the manuscript concerns an <a href="#">initiative</a> to improve healthcare (broadly defined to include the quality, safety, effectiveness, patient-centeredness, timeliness, cost, efficiency, and equity of healthcare)                                                                                                                                                                                                                                                                                                                                                                                                                                                                                                                                                                                                                                                                                                                                                                                                 |
| <b>2. Abstract</b>                            | a. Provide adequate information to aid in searching and indexing<br>b. Summarize all key information from various sections of the text using the abstract format of the intended publication or a structured summary such as: background, local <a href="#">problem</a> , methods, interventions, results, conclusions                                                                                                                                                                                                                                                                                                                                                                                                                                                                                                                                                                                                                                                                                                                  |
| <b>Introduction</b>                           | <i>Why did you start?</i>                                                                                                                                                                                                                                                                                                                                                                                                                                                                                                                                                                                                                                                                                                                                                                                                                                                                                                                                                                                                               |
| <b>3. <a href="#">Problem Description</a></b> | Nature and significance of the local <a href="#">problem</a>                                                                                                                                                                                                                                                                                                                                                                                                                                                                                                                                                                                                                                                                                                                                                                                                                                                                                                                                                                            |
| <b>4. Available knowledge</b>                 | Summary of what is currently known about the <a href="#">problem</a> , including relevant previous studies                                                                                                                                                                                                                                                                                                                                                                                                                                                                                                                                                                                                                                                                                                                                                                                                                                                                                                                              |

|                                        |                                                                                                                                                                                                                                                                                                                                                                                                                                                                                                                                                                                                                                                                                         |
|----------------------------------------|-----------------------------------------------------------------------------------------------------------------------------------------------------------------------------------------------------------------------------------------------------------------------------------------------------------------------------------------------------------------------------------------------------------------------------------------------------------------------------------------------------------------------------------------------------------------------------------------------------------------------------------------------------------------------------------------|
| <b>5. <u>Rationale</u></b>             | Informal or formal frameworks, models, concepts, and/or <u>theories</u> used to explain the <u>problem</u> , any reasons or <u>assumptions</u> that were used to develop the <u>intervention(s)</u> , and reasons why the <u>intervention(s)</u> was expected to work                                                                                                                                                                                                                                                                                                                                                                                                                   |
| <b>6. Specific aims</b>                | Purpose of the project and of this report                                                                                                                                                                                                                                                                                                                                                                                                                                                                                                                                                                                                                                               |
| <b>Methods</b>                         | <i>What did you do?</i>                                                                                                                                                                                                                                                                                                                                                                                                                                                                                                                                                                                                                                                                 |
| <b>7. <u>Context</u></b>               | Contextual elements considered important at the outset of introducing the <u>intervention(s)</u>                                                                                                                                                                                                                                                                                                                                                                                                                                                                                                                                                                                        |
| <b>8. <u>Intervention(s)</u></b>       | <ul style="list-style-type: none"> <li>a. Description of the <u>intervention(s)</u> in sufficient detail that others could reproduce it</li> <li>b. Specifics of the team involved in the work</li> </ul>                                                                                                                                                                                                                                                                                                                                                                                                                                                                               |
| <b>9. Study of the Intervention(s)</b> | <ul style="list-style-type: none"> <li>a. Approach chosen for assessing the impact of the <u>intervention(s)</u></li> <li>b. Approach used to establish whether the observed outcomes were due to the <u>intervention(s)</u></li> </ul>                                                                                                                                                                                                                                                                                                                                                                                                                                                 |
| <b>10. Measures</b>                    | <ul style="list-style-type: none"> <li>a. Measures chosen for studying <u>processes</u> and outcomes of the <u>intervention(s)</u>, including rationale for choosing them, their operational definitions, and their validity and reliability</li> <li>b. Description of the approach to the ongoing assessment of contextual elements that contributed to the success, failure, efficiency, and cost</li> <li>c. Methods employed for assessing completeness and accuracy of data</li> </ul>                                                                                                                                                                                            |
| <b>11. Analysis</b>                    | <ul style="list-style-type: none"> <li>a. Qualitative and quantitative methods used to draw <u>inferences</u> from the data</li> <li>b. Methods for understanding variation within the data, including the effects of time as a variable</li> </ul>                                                                                                                                                                                                                                                                                                                                                                                                                                     |
| <b>12. Ethical Considerations</b>      | <u>Ethical aspects</u> of implementing and studying the <u>intervention(s)</u> and how they were addressed, including, but not limited to, formal ethics review and potential conflict(s) of interest                                                                                                                                                                                                                                                                                                                                                                                                                                                                                   |
| <b>Results</b>                         | <i>What did you find?</i>                                                                                                                                                                                                                                                                                                                                                                                                                                                                                                                                                                                                                                                               |
| <b>13. Results</b>                     | <ul style="list-style-type: none"> <li>a. Initial steps of the <u>intervention(s)</u> and their evolution over time (e.g., time-line diagram, flow chart, or table), including modifications made to the intervention during the project</li> <li>b. Details of the <u>process</u> measures and outcome</li> <li>c. Contextual elements that interacted with the <u>intervention(s)</u></li> <li>d. Observed associations between outcomes, interventions, and relevant contextual elements</li> <li>e. Unintended consequences such as unexpected benefits, problems, failures, or costs associated with the <u>intervention(s)</u>.</li> <li>f. Details about missing data</li> </ul> |
| <b>Discussion</b>                      | <i>What does it mean?</i>                                                                                                                                                                                                                                                                                                                                                                                                                                                                                                                                                                                                                                                               |
| <b>14. Summary</b>                     | <ul style="list-style-type: none"> <li>a. Key findings, including relevance to the <u>rationale</u> and specific aims</li> <li>b. Particular strengths of the project</li> </ul>                                                                                                                                                                                                                                                                                                                                                                                                                                                                                                        |

|                           |                                                                                                                                                                                                                                                                                                                                                                                                                                                                                                                           |
|---------------------------|---------------------------------------------------------------------------------------------------------------------------------------------------------------------------------------------------------------------------------------------------------------------------------------------------------------------------------------------------------------------------------------------------------------------------------------------------------------------------------------------------------------------------|
| <b>15. Interpretation</b> | <ul style="list-style-type: none"> <li>a. Nature of the association between the <a href="#">intervention(s)</a> and the outcomes</li> <li>b. Comparison of results with findings from other publications</li> <li>c. Impact of the project on people and <a href="#">systems</a></li> <li>d. Reasons for any differences between observed and anticipated outcomes, including the influence of <a href="#">context</a></li> <li>e. Costs and strategic trade-offs, including <a href="#">opportunity costs</a></li> </ul> |
| <b>16. Limitations</b>    | <ul style="list-style-type: none"> <li>a. Limits to the <a href="#">generalizability</a> of the work</li> <li>b. Factors that might have limited <a href="#">internal validity</a> such as confounding, bias, or imprecision in the design, methods, measurement, or analysis</li> <li>c. Efforts made to minimize and adjust for limitations</li> </ul>                                                                                                                                                                  |
| <b>17. Conclusions</b>    | <ul style="list-style-type: none"> <li>a. Usefulness of the work</li> <li>b. Sustainability</li> <li>c. Potential for spread to other <a href="#">contexts</a></li> <li>d. Implications for practice and for further study in the field</li> <li>e. Suggested next steps</li> </ul>                                                                                                                                                                                                                                       |
| <b>Other information</b>  |                                                                                                                                                                                                                                                                                                                                                                                                                                                                                                                           |
| <b>18. Funding</b>        | Sources of funding that supported this work. Role, if any, of the funding organization in the design, implementation, interpretation, and reporting                                                                                                                                                                                                                                                                                                                                                                       |

**Table 2. Glossary of key terms used in SQUIRE 2.0. This Glossary provides the intended meaning of selected words and phrases as they are used in the SQUIRE 2.0 Guidelines. They may, and often do, have different meanings in other disciplines, situations, and settings.**

### **Assumptions**

Reasons for choosing the activities and tools used to bring about changes in healthcare services at the [system](#) level.

### **Context**

Physical and sociocultural makeup of the local environment (for example, external environmental factors, organizational dynamics, collaboration, resources, leadership, and the like), and the interpretation of these factors (“sense-making”) by the healthcare delivery professionals, patients, and caregivers that can affect the effectiveness and [generalizability](#) of [intervention\(s\)](#).

### **Ethical aspects**

The value of [system](#)-level [initiatives](#) relative to their potential for harm, burden, and cost to the stakeholders. Potential harms particularly associated with efforts to improve the quality, safety, and value of healthcare services include [opportunity costs](#), invasion of privacy, and staff distress resulting from disclosure of poor performance.

### **Generalizability**

The likelihood that the [intervention\(s\)](#) in a particular report would produce similar results in other settings, situations, or environments (also referred to as external validity).

### **Healthcare improvement**

Any systematic effort intended to raise the quality, safety, and value of healthcare services, usually done at the [system](#) level. We encourage the use of this phrase rather than “quality improvement,” which often refers to more narrowly defined approaches.

### **Inferences**

The meaning of findings or data, as interpreted by the stakeholders in healthcare services – improvers, healthcare delivery professionals, and/or patients and families

### **Initiative**

A broad term that can refer to organization-wide programs, narrowly focused projects, or the details of specific interventions (for example, planning, execution, and assessment)

### **Internal validity**

Demonstrable, credible evidence for efficacy (meaningful impact or change) resulting from introduction of a specific intervention into a particular healthcare [system](#).

### **Intervention(s)**

The specific activities and tools introduced into a healthcare [system](#) with the aim of changing its performance for the better. Complete description of an intervention includes its inputs, internal activities, and outputs (in the form of a logic model, for example), and the mechanism(s) by which these components are expected to produce changes in a [system's](#) performance.

### **Opportunity costs**

Loss of the ability to perform other tasks or meet other responsibilities resulting from the diversion of resources needed to introduce, test, or sustain a particular [improvement](#) initiative

**Problem**

Meaningful disruption, failure, inadequacy, distress, confusion or other dysfunction in a healthcare service delivery [system](#) that adversely affects patients, staff, or the [system](#) as a whole, or that prevents care from reaching its full potential

**Process**

The routines and other activities through which healthcare services are delivered

**Rationale**

Explanation of why particular [intervention\(s\)](#) were chosen and why it was expected to work, be sustainable, and be replicable elsewhere.

**Systems**

The interrelated structures, people, [processes](#), and activities that together create healthcare services for and with individual patients and populations. For example, systems exist from the personal self-care system of a patient, to the individual provider-patient dyad system, to the microsystem, to the macrosystem, and all the way to the market/social/insurance system. These levels are nested within each other.

**Theory or theories**

Any “reason-giving” account that asserts causal relationships between variables (causal theory) or that makes sense of an otherwise obscure [process](#) or situation (explanatory theory). Theories come in many forms, and serve different purposes in the phases of [improvement](#) work. It is important to be explicit and well-founded about any informal and formal theory (or theories) that are used.
